1 **Title Page**

2 **BDNF/TrkB.T1 signaling is a novel mechanism for astrocyte morphological maturation**

3

4 Leanne M. Holt<sup>1,2</sup>, Natasha L. Pacheco<sup>1</sup>, Raymundo Hernandez<sup>2</sup>, Muhannah Hossain<sup>2</sup> and  
5 Michelle L. Olsen<sup>1,2</sup>

6

7 <sup>1</sup> Department of Cell, Developmental, and Integrative Biology, University of Alabama at  
8 Birmingham, 1918 University Blvd., Birmingham, Alabama 35294

9 <sup>2</sup> School of Neuroscience, Virginia Polytechnic and State University, Life Sciences Building Room  
10 213, 970 Washington St. SW, Blacksburg, Virginia 24061.

11

12 \*Address correspondence to:

13 Michelle Olsen, PhD

14 School of Neuroscience

15 970 Washington Street SW, LS1 RM 213

16 Virginia Polytechnic and State University

17 Blacksburg, Virginia, 24060

18 Phone: (540) 231-7394

19 Fax: (540) 231-4043

20 E-mail: [molsen1@vt.edu](mailto:molsen1@vt.edu)

21

22 **Abstract**

23 Brain derived neurotrophic factor (BDNF) is a critical growth factor involved in the maturation of  
24 neurons, including neuronal morphology and synapse refinement. Herein, we demonstrate  
25 astrocytes express high levels of BDNF's receptor, TrkB (in the top 20 of protein-coding  
26 transcripts), with nearly exclusive expression of the truncated isoform, TrkB.T1 which peaks in  
27 expression during astrocyte morphological maturation. Using a novel culture paradigm, we show  
28 that astrocyte morphological complexity is increased in the presence of BDNF and is dependent  
29 upon BDNF/TrkB.T1 signaling. Deletion of TrkB.T1 *in vivo* revealed morphologically immature  
30 astrocytes with significantly reduced volume and branching, as well as dysregulated expression  
31 of perisynaptic genes associated with mature astrocyte functions, including synaptogenic genes.  
32 Indicating a role for functional astrocyte maturation via BDNF/TrkB.T1 signaling, TrkB.T1 KO  
33 astrocytes do not support normal excitatory synaptogenesis. These data suggest a significant role  
34 for BDNF/TrkB.T1 signaling in astrocyte morphological maturation, a critical process for CNS  
35 development.

36

37 **Keywords**

38 astrocyte, BDNF, TrkB, development, synaptogenesis, morphogenesis

39

## 40 **Introduction**

41           Astrocyte maturation is crucial developmental processes for normal CNS function. In the  
42 rodent cortex, astrocyte maturation takes place largely during the first 2-4 postnatal weeks.  
43 Importantly, this includes morphological maturation wherein immature astrocytes elaborate their  
44 processes and infiltrate the neuropil with fine, terminal, leaflet processes (Bushong et al., 2004).  
45 These leaflet terminals represent important functional structures, allowing cell-cell communication  
46 with neighboring astrocytes and enwrapping of synapses—where astrocytes participate in  
47 neurotransmitter uptake and synapse development and stabilization (Farhy-Tselnicker and Allen,  
48 2018; Oberheim et al., 2012). Underscoring the morphological complexity of these cells, estimates  
49 indicate a single mature rodent astrocyte encompasses between 20,000 – 80,000  $\mu\text{M}^3$  of domain  
50 space (Bushong et al., 2002; Halassa et al., 2007), associates with 300-600 neuronal dendrites  
51 (Halassa et al., 2007), and contacts more than 100,000 individual synapses (Freeman, 2010).  
52 The maturation period of astrocyte morphogenesis coincides with neuronal synaptic refinement  
53 (Freeman, 2010; Morel et al., 2014) and differential expression of key genes associated with  
54 mature astrocyte functions, such as Glt1, Kir4.1, and Aqp4 (Clarke et al., 2018; Molofsky and  
55 Deneen, 2015; Molofsky et al., 2012; Morel et al., 2014; Nwaobi et al., 2014). While the time  
56 course of astrocyte morphogenesis is well defined, few studies have attempted to identify  
57 molecular signals guiding astrocyte morphogenesis and maturation. To date, three mechanisms  
58 have been identified: Fibroblast Growth Factor (FGF)/Heartless signaling (Stork et al., 2014),  
59 glutamate/mGluR5 signaling (Morel et al., 2014), and contact-mediated neurexin/neuroigin  
60 (Stogsdill et al., 2017).

61           BDNF (Brain Derived Neurotrophic Factor) is a critical growth factor in the development,  
62 maturation, and maintenance of the CNS. Its role in neuronal cell growth, differentiation,  
63 morphology, and synaptogenesis via TrkB receptor signaling is well characterized (Autry and  
64 Monteggia, 2012; Fenner, 2012; Park and Poo, 2013). In the CNS, TrkB has two main isoforms.  
65 The full-length receptor, TrkB.FL, possesses a tyrosine kinase domain that autophosphorylates

66 with BDNF binding, and a truncated receptor, TrkB.T1. While TrkB.T1 lacks the canonical tyrosine  
67 kinase domain, BDNF binding to this receptor is thought to signal through a RhoGTPase inhibitor  
68 and the phospholipase C (PLC) pathway (Deinhardt and Chao, 2014; Fenner, 2012).  
69 Dysregulation of BDNF/TrkB signaling has been implicated in multiple neurological and  
70 neurodevelopmental disorders (Park and Poo, 2013). However, a role for BDNF in the  
71 developmental maturation of astrocytes has not been investigated.

72 Here for the first time we demonstrate that *Ntrk2*, the gene that encodes BDNF's receptor  
73 is highly enriched in astrocytes, particularly during the critical period of astrocyte morphological  
74 maturation. RNA sequencing and qPCR reveal that astrocytes predominately express the  
75 truncated TrkB (TrkB.T1) receptor. TrkB.T1 receptor expression mediates increased astrocyte  
76 morphological complexity in response to BDNF *in vitro*, and TrkB.T1 KO astrocytes *in vivo* remain  
77 morphologically immature with significantly reduced cell volumes and morphological complexity.  
78 TrkB.T1 KO astrocytes exhibit dysregulation of genes associates with perisynaptic mature  
79 astrocyte function, including synaptogenic genes. Finally, co-culture studies indicate TrkB.T1 KO  
80 astrocytes do not support normal synaptic development. Together, these data suggest a  
81 significant role for BDNF/TrkB.T1 signaling in astrocyte morphogenesis and indicate this signaling  
82 may contribute to astrocyte regulation of neuronal synapse development.

### 83 **Results**

#### 84 *Astrocytes express high levels of truncated TrkB.T1 mRNA*

85 RNA sequencing was performed on cortical astrocytes that were acutely isolated from late  
86 juvenile (PND 28) mice via magnetic separation (n = 5 replicates) (Holt and Olsen, 2016).  
87 Postnatal day 28 was chosen based on reports indicating astrocytes are considered  
88 morphologically mature at this stage of development (Bushong et al., 2004; Morel et al., 2014).  
89 Analysis of this sequencing data revealed *Ntrk2*, the gene encoding BDNF's high affinity receptor  
90 TrkB, to be in the top 20 of all protein coding RNA's (#18) detected. The two isoforms are

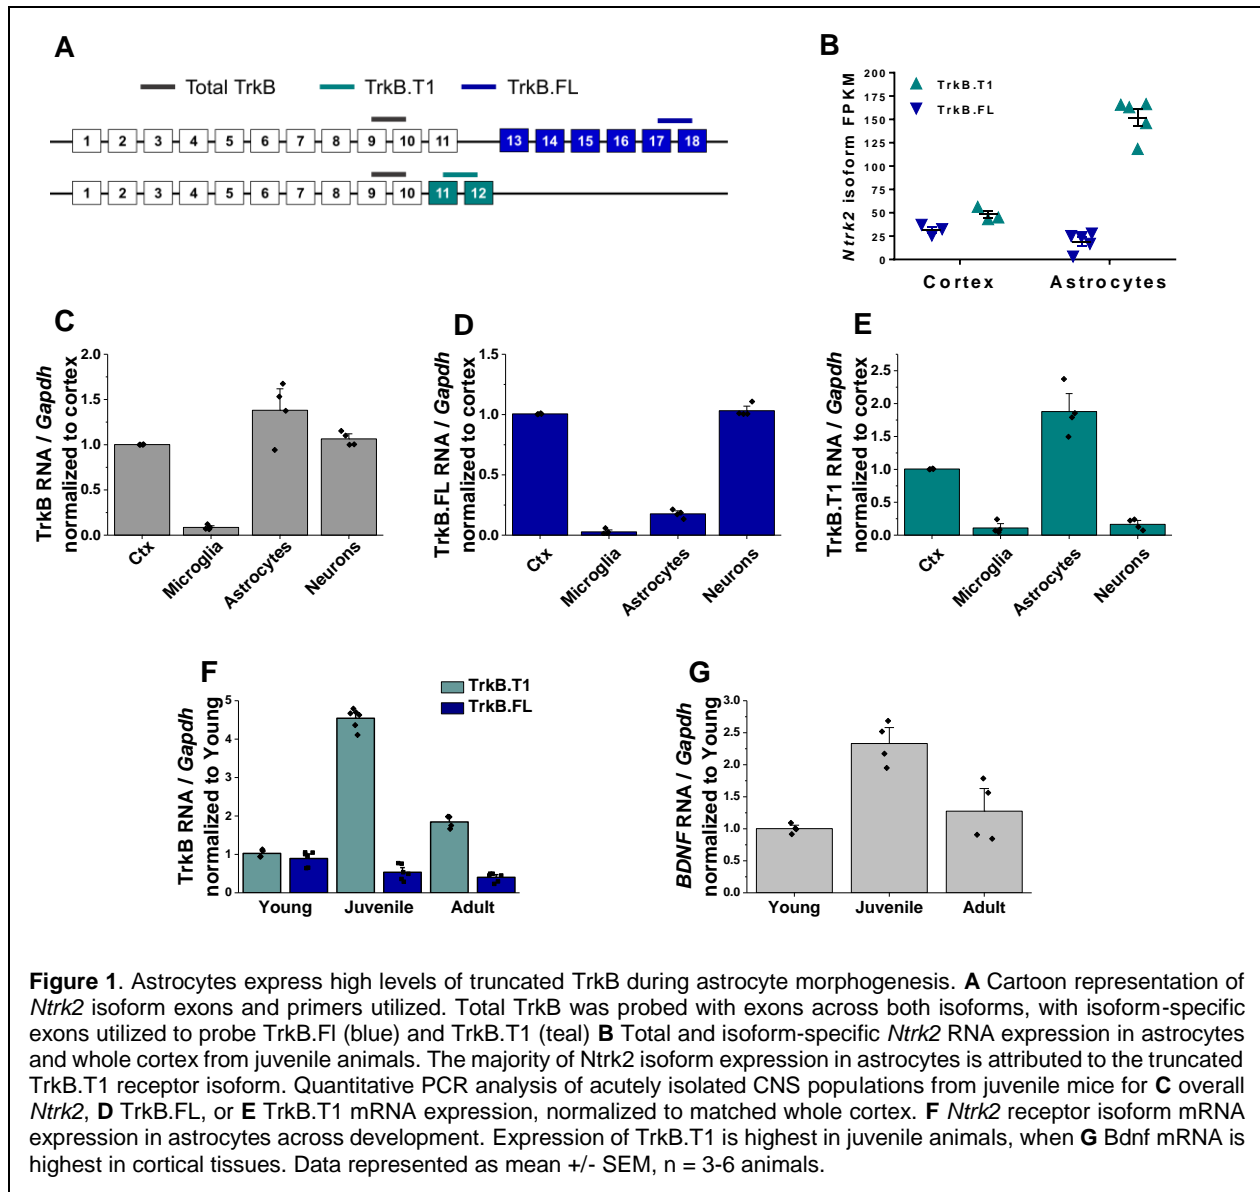

91 distinguishable given that the full-length receptor contains exons for the tyrosine kinase domain,  
 92 while the truncated TrkB.T1 receptor lacks this domain but has an additional exon (exon 12) not  
 93 found in the full length receptor (Fig. 1A). Therefore, isoform-specific transcript expression was  
 94 analyzed from the isolated astrocytes and corresponding whole cortex. This analysis revealed  
 95 that PND28 astrocytes predominately express the truncated isoform, with nearly 90% of all *Ntrk2*  
 96 expression in cortical astrocytes attributed to TrkB.T1 (151.91 +/- 9.18 FPKM for NM\_008745,  
 97 19.30 +/- 4.45 FPKM for NM\_001025074) (Fig. 1b).

98           This result prompted us to evaluate total, full length, and truncated *Ntrk2* mRNA  
99 expression in astrocytes relative to other CNS cell populations. Sequential isolation of  
100 oligodendrocytes, microglia, astrocytes, and neurons was performed as we have previously  
101 described (Holt and Olsen, 2016) in late juvenile mice. Cellular purity was confirmed via qPCR by  
102 evaluating cell type specific gene expression (Fig S1). Oligodendrocytes were excluded for  
103 subsequent analysis due to lack of cellular purity (Fig. S1). QPCR analysis of total and isoform-  
104 specific *Ntrk2* mRNA expression indicated total TrkB (primer detects both isoforms, grey in Fig  
105 1A) was most highly expressed in astrocytes, relative to neurons or microglia. TrkB.FL is the  
106 predominant isoform expressed by neuronal populations (Fig. 1d). As indicated by the above RNA  
107 sequencing data, astrocytes predominately expressed the truncated TrkB.T1 expression (Fig.  
108 1e). Expression of the truncated receptor is highest during the juvenile period (PND 28, Fig. 1f)  
109 relative to young (PND 8) and adult (PND 60) astrocytes when total availability of BDNF peaks in  
110 the cortex (Fig. 1g). Intriguingly, this time period correlates with the height of astrocyte  
111 morphological maturation.

#### 112 *Novel serum-free primary astrocyte cultures*

113           To test a direct effect of BDNF/TrkB on astrocyte morphogenesis we turned to a novel *in*  
114 *vitro* astrocyte culture system. Here, astrocytes were acutely isolated from postnatal day 3-6 pups  
115 utilizing a previously published MACS sorting technique (Holt and Olsen, 2016; Kahanovitch et  
116 al., 2018), with the modification of elution and plating in a serum-free, defined media (Fig. 2a).  
117 Cellular purity of the cultures was verified via qPCR, with mRNA levels of GFAP that are  
118 comparable to age-matched cortex but nearly undetectable levels of microglial, oligodendrocyte,  
119 OPC, and neuronal gene expression (Fig. 2b) at both 7 and 14DIV (Table 1). TrkB mRNA and  
120 protein expression was additionally verified, with similar levels of TrkB.T1 mRNA as age-matched  
121 *in vivo* astrocytes (Fig. 2c). Importantly, *in vitro* astrocytes exhibited a developmental upregulation  
122 of TrkB.T1 mRNA at 14DIV. Immunofluorescent co-staining of astrocytes with TrkB and GFAP  
123 revealed TrkB protein expression in astrocytes, with localization to astrocytic membrane (Fig. 1D).

124 Notably,  
 125 culturing  
 126 astrocytes in  
 127 serum free  
 128 media resulted  
 129 in 3.43-fold  
 130 more complex  
 131 astrocyte as  
 132 assessed by  
 133 Shape Index of  
 134 GFAP  
 135 immunostained  
 136 cells ( $t(198) =$   
 137  $13.39$ ,  $p <$   
 138  $0.0001$ ; Fig. 2e-  
 139 f). A cumulative  
 140 frequency  
 141 analysis was  
 142 performed to  
 143 account for the  
 144 large range in  
 145 the datasets,

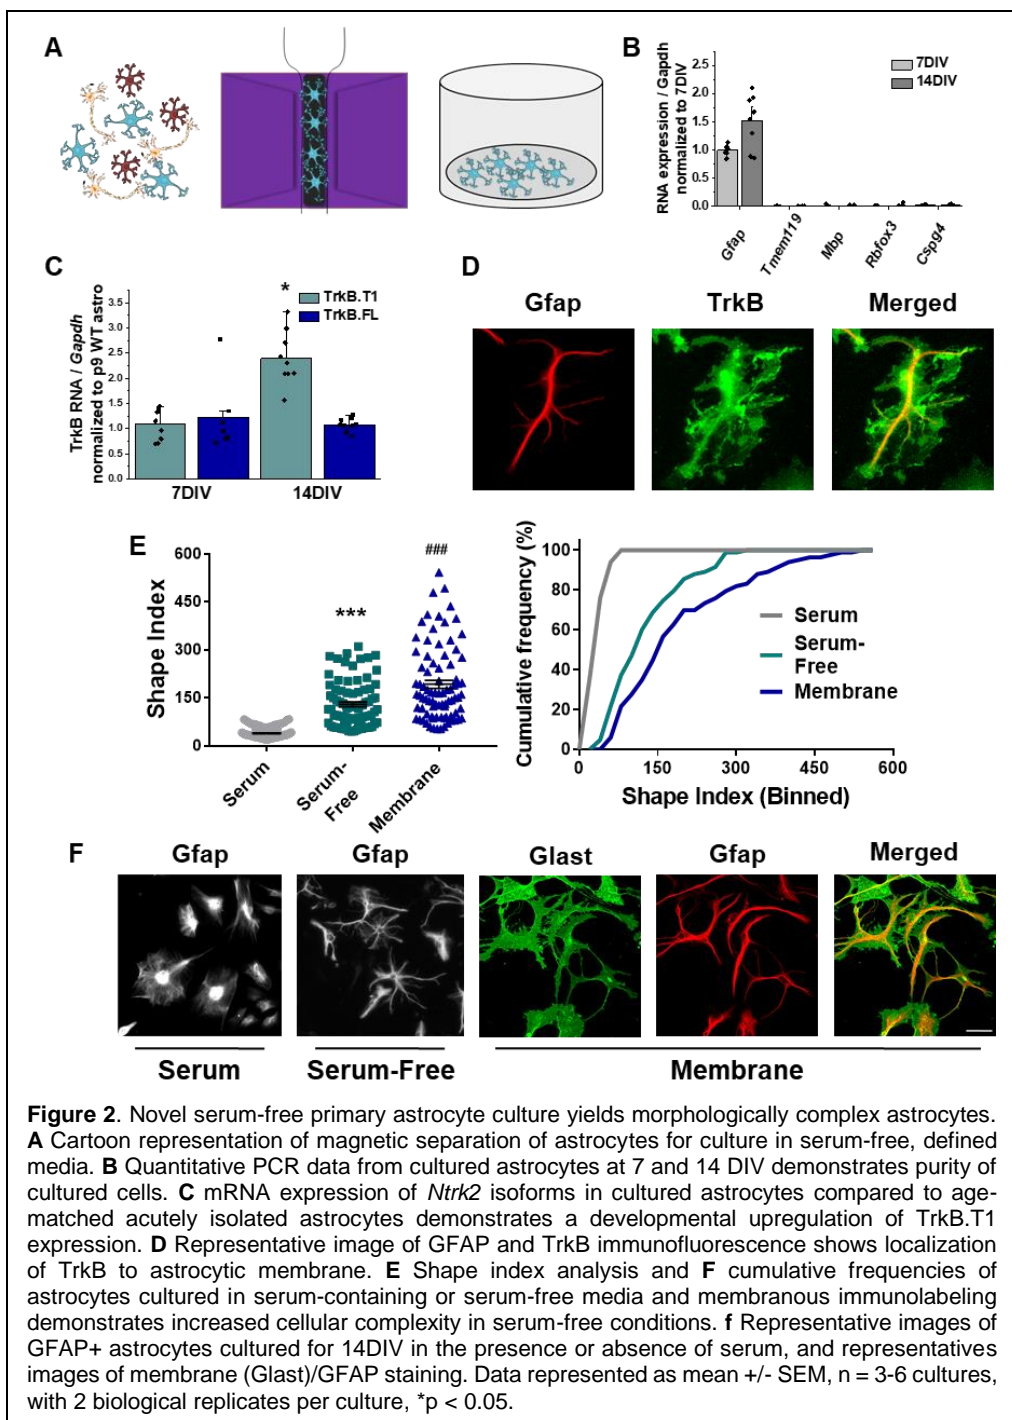

146 and demonstrates a significant right shift in serum-free astrocytes ( $D = 0.75$ ;  $p < 0.001$ ). We  
 147 additionally utilized a combination of Glast and Ezrin immunocytochemistry to demarcate both the  
 148 membrane (Glast) and the fine, peripheral processes (Ezrin) in subsequent experiments. Glast—  
 149 a membrane localized glutamate transporter—is highly expressed in astrocyte populations

150 (Kondo et al., 1995) and Ezrin—a member of the ERM protein family—links the plasma  
151 membrane to the actin cytoskeleton, and has been previously demonstrated to be localized to  
152 peripheral astrocyte processes (Derouiche and Frotscher, 2001; Lavielle et al., 2011). The  
153 visualization and quantification of astrocyte membrane, which accounts for upwards of 85% of *in*  
154 *vivo* astrocytic volume, results in more physiologically relevant information. Unsurprisingly,  
155 comparison of Shape index quantification from membrane (Glast) staining revealed a 1.5 fold  
156 increased cellular complexity relative to intermediate filaments (GFAP) staining, ( $t(164) = 4.183$ ,  
157  $p < 0.001$ ; Fig 2e-f).

158 *BDNF induces an increase in astrocyte morphological complexity.*

159         Given the high levels of astrocytic TrkB expression during a period of astrocyte  
160 morphological maturation we next evaluated a role for BDNF on astrocyte morphology.  
161 Astrocytes were isolated and cultured as described above, and experiments performed after 14  
162 DIV. Wildtype (WT) astrocytes were exposed to 10ng, 30ng, or 100ng BDNF for 24 hours,  
163 followed by paraformaldehyde fixation. These concentrations were chosen based upon their  
164 previous use in investigating BDNF's effects on neurons (Ji et al., 2005; Kline et al., 2010) and  
165 astrocytes (Ohira et al., 2007). Experiments confirmed that Glast and Ezrin targets did not change  
166 expression following BDNF exposure (SFig. 2a). Shape Index complexity analysis revealed  
167 BDNF-treated astrocytes showed a 2-fold increase in average astrocyte morphological complexity  
168 after exposure to 30ng BDNF ( $F(3, 214) = 7.047$ ;  $p = 0.001$ ; Fig 3a-c). Cumulative frequency  
169 analysis additionally demonstrated a right shift at 30ng BDNF ( $H(4) = 28.93$ ;  $p = 0.006$ ), indicating  
170 a BDNF-induced increase in astrocyte morphological complexity. We confirmed this finding with  
171 similar experiments performed in cells stained with GFAP to visualize astrocyte branch processes.  
172 SI quantification revealed a significant 1.4-fold increase in average astrocyte morphological  
173 complexity after exposure to 30ng BDNF (SFig. 2b-d). Given that 30ng BDNF exposure increased



174 both astrocyte process and total cellular complexity, all following experiments were performed  
 175 with this concentration.

176 *BDNF's effects are mediated via the truncated TrkB receptor*

177 We next performed two loss of function experiments to ascertain the specificity of  
 178 BDNF/TrkB.T1 effects on astrocytes. Current pharmacological TrkB receptor antagonists do not  
 179 specifically target the truncated TrkB.T1 receptor. Therefore, we utilized TrkB-Fc to scavenge  
 180 BDNF from the culture media. TrkB-Fc mimics the binding site of TrkB, allowing it to bind to BDNF  
 181 and prevent BDNF binding to endogenously expressed TrkB receptors (Guo et al., 2012). WT

182 14DIV astrocytes  
 183 were treated with  
 184 30ng BDNF, and  
 185 one hour later  
 186 2ug TrkB-Fc  
 187 additionally  
 188 added. SI  
 189 quantification of  
 190 cellular  
 191 complexity 24  
 192 hours later  
 193 demonstrated  
 194 that scavenging  
 195 BDNF inhibited  
 196 the increase in  
 197 astrocyte

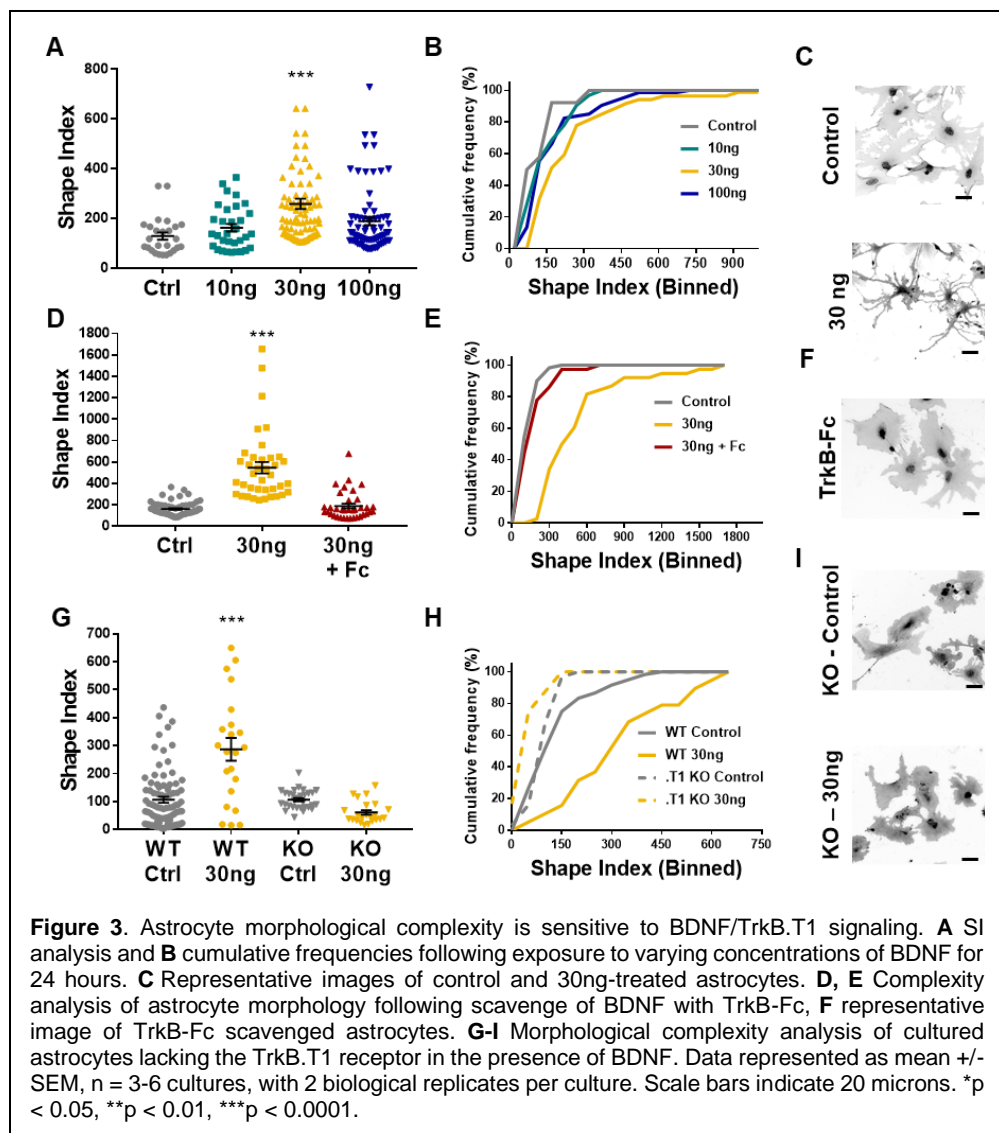

198 morphological complexity ( $H = 70.41$ ;  $p = .98$ ; Fig. 3d-f).

199 To determine the necessity of TrkB.T1 receptor signaling in astrocytes we utilized a  
200 TrkB.T1 KO mouse model (Dorsey et al., 2006). We first validated specific loss of the truncated  
201 receptor in both tissue and astrocyte cultures. Both qPCR and western blot analysis of whole  
202 cortex and isolated astrocytes demonstrated loss of TrkB.T1, specifically (SFig. 3a, b).  
203 Importantly, western blot quantification demonstrated that TrkB.T1 KO mice do not exhibit a  
204 compensatory upregulation of the full length TrkB isoform (SFig. 3c). Note, in WT cortex, the band  
205 at the lower molecular weight, representing TrkB.T1 is expressed at higher levels than TrkB.FL,  
206 supporting our RNA sequencing data from whole cortex (58% vs. 42% of total TrkB,  $t(4) = 3.419$ ;  
207  $p = 0.03$ ; Fig. 1B and SFig. 3C). Astrocytes were isolated and cultured from male pups as  
208 described above. Quantitative PCR and immunocytochemistry experiments demonstrated that  
209 these cultures do not express the truncated TrkB receptor at the mRNA or protein level (SFig. 3e-  
210 f). At 14DIV, WT and .T1 KO astrocytes were exposed to 30ng BDNF for 24 hours, and cellular  
211 complexity determined. As before, WT astrocyte SI indicated an increase in cellular complexity in  
212 response to BDNF ( $F(3, 155) = 21.66$ ;  $p = .0001$ ). However, SI quantification and cumulative  
213 frequency analysis revealed no difference in control- and 30ng-treated TrkB.T1 KO astrocyte  
214 cellular complexities ( $F(3, 155) = 21.66$ ,  $p = 0.39$ ;  $H(4, 136) = 40.88$ ,  $p = 0.99$ , respectively; Fig.  
215 3d-f). Our data, therefore, suggests that BDNF signaling through TrkB.T1 increases astrocyte  
216 morphological complexity at both the process and total membranous levels.

### 217 *In vivo loss of TrkB.T1 decreases astrocyte morphogenesis*

218 The experiments above established that BDNF signaling through the TrkB.T1 receptor  
219 induces an increase in astrocyte morphological complexity in a simplified model system. We set  
220 out to examine astrocyte morphogenesis as an indicator of astrocyte developmental maturation  
221 in TrkB.T1 KO mice. Astrocyte morphology was examined in WT and TrkB.T1 knockout male  
222 animals at PND 14 and PND 28. Here the early time point represents a period in astrocyte

223 development when astrocytes are considered morphologically immature (Bushong et al., 2004;  
 224 Morel et al., 2014). Intraventricular injections of AAV2/5 GfaABC1D driven Ick-GFP in postnatal  
 225 day 0/1 pups allows for sporadic labeling of astrocytes throughout the brain (Fig 4a,b). Confocal  
 226 z-stack images of layer II/III motor cortex astrocytes were acquired. Imaris surface reconstruction  
 227 allows for the determination of the full astrocyte morphology, and is indicative of the amount of  
 228 neuropil infiltration of the astrocyte peripheral processes (Morel et al., 2014). In line with previous  
 229 reports, WT astrocyte volume increased by 1.75-fold between PND 14 and PND 28 ( $F(3,85) =$

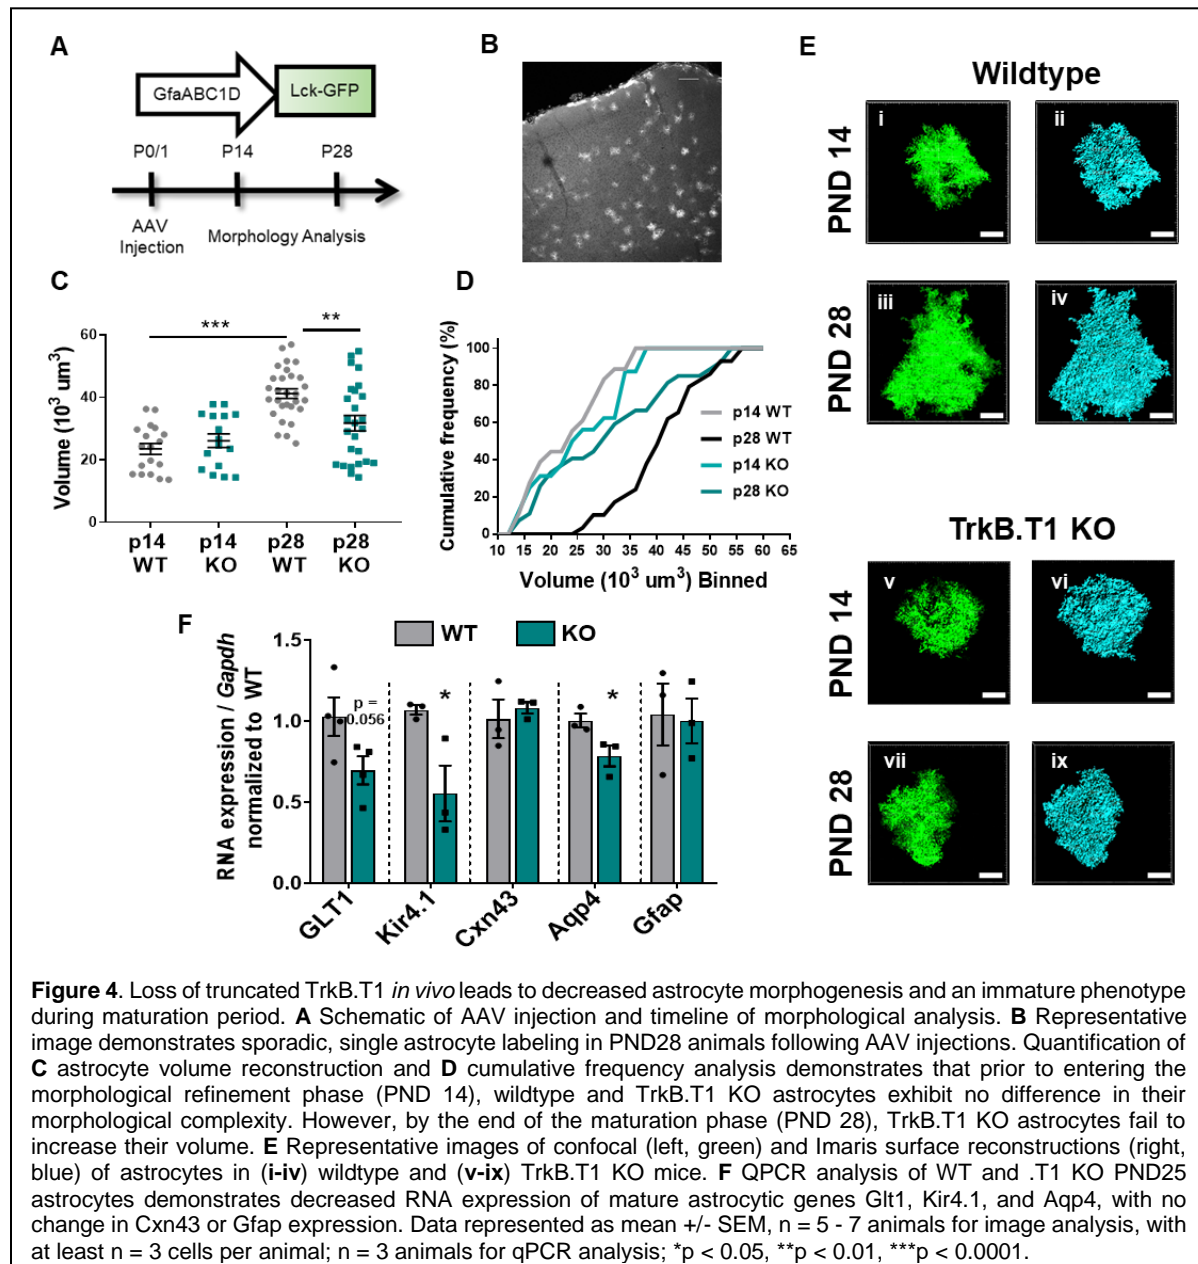

230 15.31,  $p < 0.001$ ), indicative of normal morphological maturation (Fig. 4b) (Bushong et al., 2004;  
231 Morel et al., 2014; Stogsdill et al., 2017). In contrast, this increase in morphogenesis was lost in  
232 TrkB.T1 KO animals, with no significant difference between PND 14 and 28 astrocyte volumes  
233 ( $F(3, 85) = 15.31$ ;  $p = 0.27$ ; Fig. 4b). No difference between WT and TrkB.T1 KO astrocyte  
234 morphology was detected at PND 14 ( $F(3, 85) = 15.31$ ;  $p = 0.86$ ;  $n = 16$  cells from 5 KO animals;  
235  $n = 18$  cells from 5 WT animals). By PND 28, TrkB.T1 KO astrocytes demonstrated a 30%  
236 reduction in volume compared to WT littermates (Fig 4b;  $F(3, 85) = 15.31$ ;  $p = 0.003$ ;  $n = 29$  cells  
237 from 6 WT animals,  $n = 27$  cells from 7 KO animals). Cumulative frequency analysis demonstrated  
238 a significant right shift between WT PND 14 and 28, indicating an increase in morphological  
239 complexity in wildtype astrocytes ( $H(4, 89) = 32.44$ ;  $p < .001$ ), with no difference between p14  
240 and p28 TrkB.T1 KO astrocytes ( $H(4, 89) = 32.44$ ;  $p = .728$ ). We additionally performed a  
241 secondary analysis at p28, with an AAV driving cytosolic mCherry expression in astrocytes to  
242 better visualize process branching. Subsequent Sholl analysis revealed a decreased level of  
243 astrocytic branching ( $F(45, 495) = 1.55$ ,  $p = 0.0149$ ; SFig 4C) with no change in primary branch  
244 length ( $t(527) = -1.26$ ,  $p = 0.21$ ; SFig. 4D). Thus, our data suggests that BDNF signaling onto  
245 TrkB.T1 in astrocytes is an important pathway for normal astrocyte morphogenesis.

#### 246 *In vivo loss of TrkB.T1 results in aberrant astrocytic gene expression*

247 The period of astrocyte morphogenesis overlaps with differential gene expression in  
248 astrocytes in the developing cortex (Clarke et al., 2018; Molofsky and Deneen, 2015). We thus  
249 next examined genes located perisynaptically that are associated with mature astrocyte functions  
250 (Clarke et al., 2018; Molofsky and Deneen, 2015; Nwaobi et al., 2014; Regan et al., 2007).  
251 TrkB.T1 KO and WT littermate astrocytes were acutely isolated in juvenile males (PND 25) as  
252 described above. QPCR analysis revealed decreased RNA expression in specific gene sets  
253 differentially regulated in astrocytes (Clarke et al., 2018): Kir4.1 (51.6%,  $t(4) = 2.943$ ;  $p = 0.04$ )  
254 and Aqp4 (21.7%,  $t(4) = 2.807$ ;  $p = 0.04$ ), with trending decrease in GlT1 (33.1%,  $t(6) = 2.242$ ;  $p$   
255  $= 0.056$ ) relative to WT littermate controls (Fig. 4F). No significant difference was observed in

256 genes that display no change in cortical development: Cxn43 ( $t(4) = 0.5491$ ,  $p = 0.612$ ) and Gfap  
 257 ( $t(4) = 0.171$ ,  $p = 0.87$ ) (Fig. 4F). Thus, *in vivo* loss of TrkB.T1 results in dysregulated expression  
 258 of genes associated with mature astrocyte function.

259 Astrocyte morphological maturation also overlaps with neuronal synaptogenesis and  
 260 refinement (Bushong et al., 2004; Freeman, 2010; Morel et al., 2014), and astrocytic contributions  
 261 to synaptogenesis represent an intense investigative area of astrocyte biology (Allen and Eroglu,  
 262 2017) Therefore, we next probed the above TrkB.T1 KO astrocytes for known astrocyte  
 263 synaptogenic factors SPARCL1/hevin and SPARC (ref) via qPCR. We observed a 28.55%  
 264 decrease in SPARCL1/hevin RNA expression in .T1 KO astrocytes compared to WT littermates  
 265 ( $t(5) = 4.061$ ;  $p = 0.0097$ ). Interestingly, we additionally observed a 56.16% increase in hevin-  
 266 antagonist SPARC ( $t(6) = 4.061$ ;  $p = 0.0215$ ) in .T1 KO astrocytes compared to WT littermates.  
 267 These experiments together suggest a dysregulation of astrocyte gene expression in TrkB.T1 KO  
 268 animals, with consequences on mature astrocyte functions.

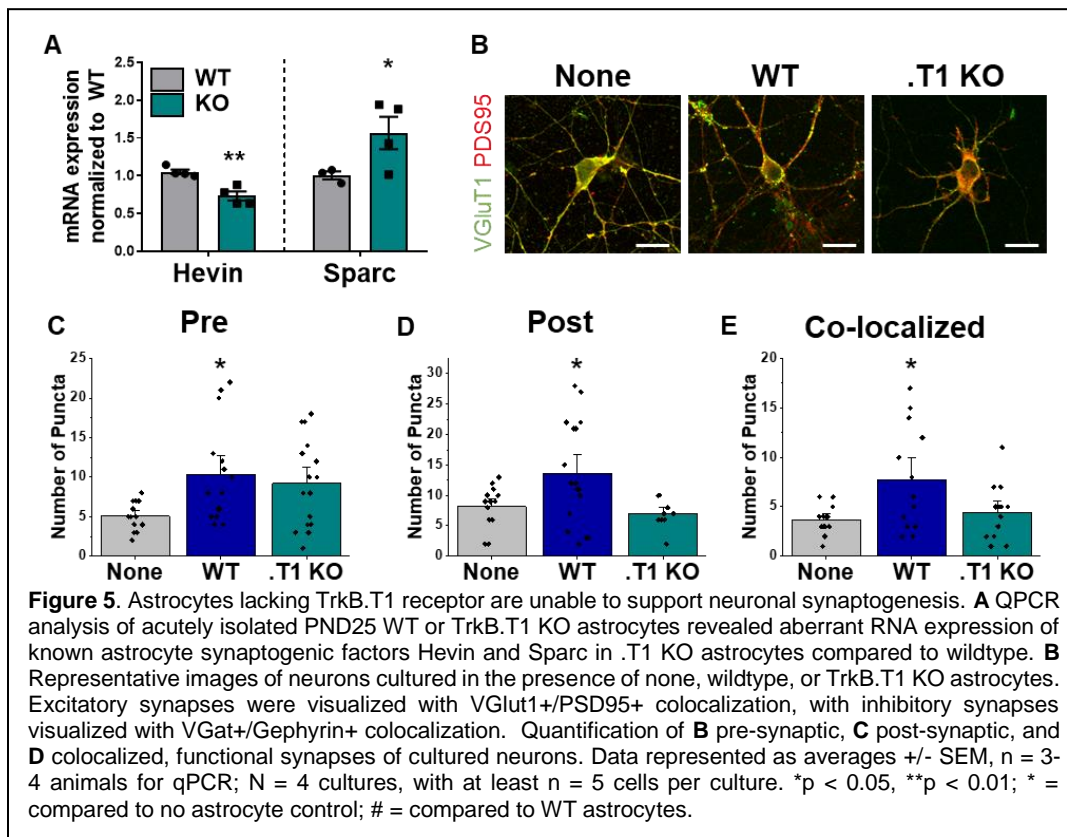

## 269 *Potential role for BDNF/TrkB.T1 astrocyte signaling on neuronal synapse development*

270 The above experiment suggests dysregulated astrocyte synaptogenic factor expression  
271 in .T1 KO astrocytes. In order to query if BDNF signaling onto astrocytes contributes to neuronal  
272 synapse development, we turned to a novel neuron-astrocyte co-culture model system. This  
273 system allows us to specifically and directly evaluate the interplay between maturing astrocytes  
274 and neurons. To this end, wildtype cortical neurons were cultured from p0/1 pups, and WT or  
275 TrkB.T1 KO astrocytes subsequently layered on top after 3 days of recovery. After 8DIV, cells  
276 were paraformaldehyde fixed and confocal images of excitatory (VGlut1+/PSD95+) synapses  
277 acquired. Excitatory synapses were evaluated due to extensive literature detailing astrocytic  
278 contributions to excitatory synaptogenesis (reviewed in (Allen and Eroglu, 2017). Puncta Analysis  
279 quantification of colocalization of pre- and post-synapses (Ippolito and Eroglu, 2010; Stogsdill et  
280 al., 2017) revealed that, as expected, excitatory synapse numbers were increased in the presence  
281 of WT astrocytes ( $F(2, 37) = 5, p = 0.013$ ) which did not occur in the presence of TrkB.T1 KO  
282 astrocytes ( $F(2, 39) = 5, p = .846$ ). Notably, further analysis revealed this effect appears to be  
283 influenced by differential consequences on pre- or postsynaptic sites. We observed a similar  
284 increase in the number of presynaptic puncta in excitatory synapses compared to WT astrocytes  
285 ( $F(2, 42) = 5.44, p = 0.799$ ) with a significant reduction in post-synaptic partners ( $F(2, 42) = 5.44,$   
286  $p = 0.015$ ). This led to a significant reduction in co-localized and presumably functional synapses  
287 (Fig. 5a, b) (Ippolito and Eroglu, 2010; Stogsdill et al., 2017). Of note, these findings correspond  
288 with the decreased hevin / increased SPARC expression observed in TrkB.T1 KO astrocytes.  
289 These studies suggest, at least in a simple model system, TrkB.T1 astrocytes do not support  
290 normal excitatory synaptic development.

## 291 **Discussion**

292 Herein we have demonstrated for the first time that BDNF is involved in the maturation of  
293 a non-neuronal cell type. Within cortical astrocytes, TrkB.T1 receptor expression is in the top 20

294 of all protein-coding transcripts, with the highest expression during astrocyte morphological  
295 refinement. We developed and utilized a novel astrocyte culture paradigm to demonstrate that  
296 BDNF induces an increase in astrocyte morphological complexity, which is dependent upon the  
297 TrkB.T1 receptor. Importantly, *in vivo* astrocyte morphology is less complex with loss of the  
298 TrkB.T1 receptor. In particular, the lack of TrkB.T1 prevented normal morphogenesis during the  
299 time of astrocyte morphological refinement, between p14 and p28, indicating BDNF/TrkB.T1  
300 signaling may drive astrocyte morphological maturation. Furthermore, BDNF signaling onto  
301 astrocytes appears to have consequences on neuronal synapse development, with decreased  
302 numbers of both excitatory and inhibitory synapses in the presence of TrkB.T1 KO astrocytes.  
303 These findings have broad implications, given the wealth of neurological disorders within which  
304 BDNF and, increasingly more often, astrocytes are implicated.

305 BDNF's role in CNS growth and maturation has been intensely studied, with a particular  
306 emphasis on the full length receptor and neuronal function. Here, we demonstrate that astrocytes  
307 express the highest levels of *Ntrk2* over other CNS cellular populations. Publicly available RNA  
308 sequencing databases corroborate our data (Zhang et al., 2014), and, in fact, additionally  
309 demonstrate that human astrocytes express the highest levels of *Ntrk2* (Kelley et al., 2018; Zhang  
310 et al., 2016). In concordance with previously published results (Rose et al., 2003), we found that  
311 neurons predominately express the full-length isoform of TrkB. While *in vitro* and *in situ*  
312 hybridization studies have demonstrated expression of the truncated TrkB isoform in glial  
313 populations (Park and Poo, 2013; Rose et al., 2003), we demonstrate for the first time that *in vivo*  
314 astrocytes express developmentally regulated levels of TrkB.T1, with the highest expression  
315 occurring during juvenile stages. This upregulation of TrkB.T1 is mediated by an intrinsic, cell-  
316 autonomous mechanism, as cultured astrocytes demonstrated similar upregulation between 7  
317 and 14DIV.

318 Truncated TrkB.T1 lacks the canonical tyrosine kinase signaling domain, and therefore  
319 has historically been presumed to act in a dominant negative capacity to prevent overactivation  
320 of BDNF signaling pathways (Fenner, 2012; Klein et al., 1989; Middlemas et al., 1994). We here  
321 have shown that BDNF induces an increase in astrocyte morphological complexity, and this effect  
322 is lost in TrkB.T1 KO astrocytes. Therefore, our data suggests an intrinsic and direct mechanism  
323 of action. Supporting this, *in vivo* dysfunction of astrocytic TrkB.T1 has been implicated in  
324 mediating neuropathic pain and motor dysfunction following spinal cord injuries (Matyas et al.,  
325 2017). BDNF application to cultured astrocytes resulted in a PLC $\gamma$ -IP3R mediated rise in calcium  
326 with kinetics different from cultured neurons (Rose et al., 2003). Additionally, the TrkB.T1 receptor  
327 has been found to co-immunoprecipitate with a RhoGTPase inhibitor, RhoGDI $\alpha$  in primary  
328 astrocyte cultures, and inhibition of RhoA increased the area occupied by cultured astrocytes  
329 (Ohira et al., 2005). Given RhoGTPases's known roles in regulating astrocytic cytoskeletal  
330 dynamics (Zeug et al., 2018), this presents a potential mechanism by which BDNF increases  
331 astrocyte morphological complexity in astrocytes. It is unclear how BDNF is processed by  
332 astrocytes following binding to TrkB.T1. However, our data suggests TrkB.T1 plays an active,  
333 direct role in astrocyte biology.

334 Little is known regarding the mechanisms governing astrocyte morphogenesis and  
335 maturation. Thus far, three mechanisms have been identified. In drosophila, FGF signaling  
336 through the Heartless receptor determines astrocyte domain size and infiltration into the neuropil  
337 (Stork et al., 2014). Pharmacological and genetic manipulations of mGluR5 in astrocytes reduced  
338 the developmental increase in astrocytic volume between PND14 and 21 (Morel et al., 2014).  
339 Similarly, loss of neuroligins in astrocytes and/or their neuronal neurexin partner reduced  
340 astrocyte morphogenesis in the visual cortex by PND21. Based on our findings, we propose  
341 BDNF signaling through truncated TrkB.T1 receptor as a novel mediator of astrocyte  
342 morphological maturation. This is supported by our evaluation of known developmentally



343 regulated and mature astrocyte functional markers, Kir4.1 and GlT1. Similar to others (Morel et  
344 al., 2014; Stogsdill et al., 2017), we found that wildtype astrocytes exhibited a 1.75-fold increase  
345 in volume during astrocyte morphological maturation. However, TrkB.T1 KO astrocytes did not  
346 exhibit normal morphogenesis. No difference in astrocyte volume between young and mature  
347 ages in TrkB.T1 KO animals was found, indicative of a failure to properly undergo morphogenesis  
348 and maturation, and resulted in a 30% decrease in astrocyte volume compared to mature wildtype  
349 littermates. An important limitation to our data is the utilization of a global TrkB.T1 knockout mouse  
350 model to assess *in vivo* astrocyte morphology. However, given that in astrocyte cultures, whereby  
351 the loss of the receptor is cell-type specific, TrkB.T1 KO astrocytes do not morphologically  
352 respond to BDNF. Additionally, qPCR analysis of microglia, astrocytes, and neurons at the time  
353 of astrocyte morphological maturation indicates that TrkB.T1 receptor expression is largely  
354 confined to astrocyte populations. We therefore make the argument that within the CNS, the  
355 majority of effects within the global TrkB.T1 KO mouse may be attributable to astrocytes.  
356 Regardless of the *in vivo* cell-type specificity, our data cumulatively highlights BDNF signaling  
357 through astrocytic TrkB.T1 receptor as a mediator of astrocyte morphological maturation.

358         Peripheral astrocyte processes, which are dramatically increased in complexity during the  
359 morphological refinement phase, facilitate many known astrocyte biological functions including  
360 enwrapment of synapses. Astrocytes actively contribute to synaptogenesis through release of  
361 astrocyte derived factors such as hevin (Kucukdereli et al., 2011), thrombospondins  
362 (Christopherson et al., 2005), SPARC (Kucukdereli et al., 2011), and glypicans 4/6 (Allen et al.,  
363 2012). Astrocyte enwrapment of synapses is additionally known to be regulated by neuronal  
364 activity, and can stabilize synapses following LTP (Bernardinelli et al., 2014). We found decreased  
365 expression of hevin, and increased expression of its antagonist SPARC. As TrkB.T1 KO  
366 astrocytes demonstrate decreased morphological complexity and dysregulated astrocyte  
367 synaptogenic factor expression, we additionally investigated how BDNF signaling onto astrocytes  
368 may impact neuronal synapse number. To this end, we developed a novel astrocyte-neuron co-

369 culture paradigm. Utilization of MAC sorting technique allows for separation and subsequent  
370 combination of different cellular subtypes, genotypes, and ages within cultures. We posit that this  
371 technique will be useful to many for investigations of cell-to-cell communication. We found  
372 neurons cultured in the presence of .T1 KO astrocytes exhibited decreased numbers of overall  
373 excitatory post-synaptic elements and an overall reduction in numbers of co-localized pre and  
374 post-synaptic elements. These findings corroborate the aberrant RNA expression observed, as  
375 hevin and SPACR control the structural formation of synapses, particularly at the postsynaptic  
376 side (Jones et al., 2011; Kucukdereli et al., 2011). Notably, thus far, no reports have explored  
377 interactions between BDNF and known astrocyte-mediated synaptogenic factors. It is also  
378 noteworthy that experiments revealing astrocyte-mediated synaptogenesis are often performed  
379 in neuron-astrocyte co-cultures with BDNF added as a supplement (Allen et al., 2012; Johnson  
380 et al., 2007; Pfriederger and Barres, 1997; Ullian et al., 2001). Future studies are needed to elucidate  
381 BDNF's role in astrocyte-mediated synaptogenesis and refinement.

382 We demonstrated that scavenging BDNF from the media within an hour of exposure  
383 prevented the increase in cellular complexity 24 hours later, suggesting that BDNF must be  
384 actively present to elicit an increase in astrocyte morphological complexity. This experiment is  
385 particularly interesting given that following synaptogenesis, BDNF secretion from neurons is  
386 largely targeted to synaptic zones and is secreted in an activity-dependent manner (Park and  
387 Poo, 2013). While outside of the scope of this paper, the influence of BDNF on astrocyte  
388 morphological complexity may indeed extend into activity-dependent maintenance of astrocyte  
389 morphology and enwrapment of synapses. One study suggests that this may indeed occur, as  
390 siRNA knockdown of TrkB.T1 in adult rats leads to decreased ability of cortical astrocytes to  
391 modulate their morphology in response to neuronal activity (Ohira et al., 2007). These results also  
392 highlight that BDNF may be necessary for the maintenance of astrocyte morphology in adulthood.

393            Here we demonstrate BDNF's receptor, TrkB.T1, is highly enriched in cortical astrocytes,  
394 particularly during the period of astrocyte morphological maturation, and that BDNF/TrkB.T1  
395 signaling in astrocytes plays a critical role in astrocyte morphogenesis and may play a role in  
396 proper astrocyte maturation. Furthermore, proper neuronal synaptogenesis was lost with deletion  
397 of the TrkB.T1 receptor in astrocytes. Our studies suggest that BDNF/TrkB.T1 signaling is a novel  
398 unexplored pathway in the role of astrocytes in synapse development. Given the role of aberrant  
399 synapse development in neurological dysfunction, our results herein suggest astrocyte  
400 BDNF/TrkB.T1 signaling may contribute to neurodevelopmental disorders in which BDNF  
401 signaling is implicated.

402

## 403 **Methods**

### 404 *Animals*

405 All experiments were performed according to NIH guidelines and with approval from the Animal  
406 Care and Use Committee of the University of Alabama at Birmingham and Virginia Polytechnic  
407 Institute and State University. All animals were maintained on a 12 hour light/dark cycle (lights on  
408 at 9pm, lights off at 9am) with food and water available *ad libitum*. Every effort was made to  
409 minimize pain and discomfort. Wild-type and *TrkB.T1<sup>-/-</sup>* and wild-type littermate mice (Dorsey et  
410 al., 2006) C57/B6 mice were used for these experiments. *TrkB.T1<sup>-/-</sup>* mice were a generous gift  
411 from Dr. Lino Tessarollo.

### 412 *Cortical Dissection and Dissociation*

413 Briefly, mice (young, postnatal day 7 +/- 1 days (PND 7), late juvenile mice (PND 28 +/- 3 days  
414 (PND 28) or adult mice (PND 60 +/- 10 days (PND 60) were anesthetized via CO<sub>2</sub> and decapitated.  
415 Whole cortex was microdissected in ice-cold ACSF (120mM NaCl, 3.0 mM KCl, 2mM MgCl,  
416 0.2mM CaCl, 26.2mM NaHCO<sub>3</sub>, 11.1 mM glucose, 5.0mM HEPES, 3mM AP5, 3mM CNQX)  
417 bubbled with 95% oxygen. Tissue was minced into 1mm<sup>3</sup> pieces and dissociated for 15-30  
418 minutes using Worthington Papain Dissociation Kit. Tissue was subsequently triturated until a  
419 single-cell suspension was achieved and filtered through a 70µM filter.

### 420 *Astrocyte Isolations*

421 Astrocytes were acutely isolated as previously described (Holt and Olsen, 2016; Kahanovitch et  
422 al., 2018; Stoica et al., 2017). Following dissociation, microglia and myelin were first removed  
423 from the cell suspension. Cells were incubated for 15 minutes at 4°C with 15µL of Miltenyi Biotec's  
424 Myelin Removal Kit and Cd11b<sup>+</sup> MicroBeads. The suspension was then applied to a prepped LS  
425 column, washed three times, and the flow-through collected. This flow through was subsequently  
426 used to isolate astrocytes utilizing Miltenyi Biotec's ACSA-2<sup>+</sup> MicroBead kit. The cell suspension  
427 (in 150uL 0.5% fatty-acid free BSA in PBS) was incubated at 4°C for 15 minutes with 15-20µL  
428 FcR blocker, followed by a 15 minute incubation with 15-20µL ACSA-2 microbeads. Cells were

429 applied to a prepped LS column. Astrocytes were eluted from the LS column after three washes,  
430 with 5mL buffer and the supplied plunger.

#### 431 *Sequential CNS population isolations*

432 Cells were acutely isolated as previously described (Holt and Olsen, 2016). Following  
433 dissociation, oligodendrocytes were isolated first with a 10 minute incubation with 15uL Myelin+  
434 microbeads. Cells were applied to a prepped LS column, and washed 3x. All flow through was  
435 collected and utilized to isolate the subsequent cellular populations. Oligodendrocytes were eluted  
436 from the LS column after three washes, with 5mL buffer and the supplied plunger. Microglia were  
437 isolated next, with a 10 minute incubation with 15 uL Cd11b+ microbeads. Cells were applied to  
438 a prepped LS column, and washed 3x. As before, all flow through was collected and utilized to  
439 isolate the next cellular population. Microglia were eluted from the LS column after three washes,  
440 with 5mL buffer and the supplied plunger. Astrocytes were subsequently isolated as described  
441 above. Finally, neuronal populations were isolated using Neuronal isolation kit. The flow through  
442 was again collected and used to isolate neurons utilizing Miltenyi Biotec's Neuron Isolation Kit.  
443 The cell suspension was incubated with 20µL biotinylated antibodies for 10 minutes at 4°C,  
444 followed by a 15 minute incubation with 20µL anti-biotin microbeads. Cells were applied to a  
445 prepped LD column. Neurons were collected in the flow through of two washes.

#### 446 *RNA isolation and qPCR*

447 Total RNA was isolated using Ambion's PureLink RNA Mini Isolation kit according to the  
448 manufacturer's instructions. RNA samples designated for RNA Sequencing were eluted in 30 µL  
449 filtered, autoclaved Mill-Q water. Subsequently, 2ng of RNA was reverse transcribed into cDNA  
450 using BioRad's iScript kit or BioRad's iScript SuperMix. All cDNA was normalized to 350 or 500ng  
451 (for BDNF mRNA assays) following conversion. The relative mRNA expression levels were  
452 determined using real-time quantitative PCR by General Taqman PCR master mix and TaqMan  
453 specific probes (Table 1). Relative mRNA expression levels were determined by the ddCt method,  
454 with each normalization indicated where appropriate.

#### 455 *RNA Sequencing*

456 RNA samples were tested for quality on the Agilent Tapestation 2200 (Agilent Technologies,  
457 Santa Clara, CA). The NEB Next rRNA Depletion Kit (NEB #E6310X) was used to process 250  
458 ng of total RNA. RNA-Seq libraries (400 bp) were created using the NEBNext Ultra II Directional  
459 RNA Library Prep Kit for Illumina (NEB #E7760L). Samples were individually indexed using the  
460 NEBNext Multiplex Oligos for Illumina (NEB #E6609S). Adapter ligated DNA was amplified in 13  
461 cycles of PCR enrichment. Libraries were quantified with the Quanti-iT dsDNA HS Kit (Invitrogen)  
462 and qPCR. Library validation was performed on the Agilent 2200 Tapestation. Independently  
463 indexed stranded cDNA libraries were pooled and sequenced for 150 cycles with the Illumina  
464 NovaSeq 6000 S2 Kit. All samples were sequenced at 85-90 million read depth, paired-end 2 x  
465 150 bp, and in reverse-stranded orientation.

#### 466 *Bioinformatics analyses*

467 Initial analyses (raw reads processing through read alignment) were run in the University of  
468 Alabama at Birmingham's Cheaha High Performance Computing (HPC) cluster environment.  
469 Raw RNA-Seq reads were concatenated (per R1 and R2 fastq read, respectively) and quality  
470 trimmed using Trim Galore! Version 0.4.3. Sequence quality of trimmed reads was inspected  
471 using FastQC (version 0.11.15). The STAR aligner (version 2.5.2) (Dobin et al., 2013) was used  
472 in the basic two-pass mode to align the trimmed reads to the iGenomes UCSC mm10 mouse  
473 genome. BAM files were sorted by coordinate, and indexed using SAMtools (Li et al., 2009)  
474 (version 1.3.1). To examine general gene expression levels, a gene counts table was created  
475 using featureCounts (Liao et al., 2014) (release 1.5.2) and used as input for DESeq2 (Love et al.,  
476 2014) (version 1.16.1) in the RStudio environment (version 3.4.1). Genes with a row sum less  
477 than 10 were excluded prior to differential gene expression analysis. Normalized counts were  
478 extracted for each biological replicate to calculate the average normalized counts per respective  
479 gene. For transcript expression analysis, the STAR-aligned BAM files were processed in the  
480 University of Alabama at Birmingham Galaxy platform (Afgan et al., 2016) using Stringtie (Pertea

481 et al., 2016) (Galaxy tool version 1.3.3.1) as described in the recommended workflow, with minor  
482 modifications: 1) the reverse strand option was selected and 2) the iGenomes UCSC mm10  
483 genome was used as the reference guide assembly data set for the first Stringtie run. *Ntrk2*  
484 transcript expression levels (FPKM) were extracted from the second Stringtie run's Assembled  
485 Transcripts output files per respective biological replicate. All detailed scripts used for these  
486 analyses are available upon request.

#### 487 *Protein extraction and immunoblotting*

488 Proteins were extracted by homogenizing samples in lysis buffer (1% sodium dodecyl sulfate  
489 (SDS), 100mM Tris(hydroxymethyl)aminomethane (Tris) buffer, pH 7.5), supplemented with  
490 protease and phosphatase inhibitors (Sigma), followed by two rounds of sonication for seven  
491 seconds. Lysates were subsequently centrifuged for 5 minutes at 16,000 xg. ThermoScientific's  
492 Peirce BCA assay was utilized to determine protein concentrations. Proteins were heated to 60°C  
493 for 15 minutes with 2x loading buffer (100mM Tris, pH 6.8, 4% SDS, in Laemmli-sodium dodecyl  
494 sulfate, 600mM B-mercaptoethanol, 200mM Dithiothreitol (DTT), and 20% glycerol). Equal  
495 amounts of protein per sample (5 or 10ug) was loaded into a 4-20% gradient precast mini-  
496 PROTEAN TGX gel (Bio-Rad) and proteins were separated with 200V in 1x running buffer (24.76  
497 mM Tris base, 190mM glycine, 0.1% SDS). Proteins were transferred to a nitrocellulose  
498 membrane using the Trans-blot turbo system (Bio-Rad), mixed molecular weight protocol (2.5A,  
499 25V for 7 min), followed by 1 hour blocking with LI-COR blocking buffer at a 1:1 ratio with TBS.

500 Primary antibodies, including concentration and incubation times, are given in Table 2. All  
501 secondary antibodies were LI-COR, and incubated at 1:10,000 for 1 hour at room temperature.  
502 Imaging was performed on a LI-COR Odyssey machine on both the 680 and 800 channels.

#### 503 *Serum-free primary astrocyte culture*

504 Astrocytes were isolated from postnatal day 3-6 pups as described above and previously  
505 (Kahanovitch et al., 2018). Following elution, astrocyte cell number was determined, and 0.75-1.0  
506 x 10<sup>5</sup> cells were plated on 13mm glass coverslips in a 24 well plate. The coverslips were poly-l-

507 ornithine treated and laminin-coated. Astrocytes were maintained in serum-free, defined media  
508 (50% Neurobasal media, 50% MEM, 1mM sodium pyruvate, 2mM glutamine, and 1x B27). On  
509 the first day post-plating, fresh media was added. On the third day post-plating, a complete media  
510 change was performed. Subsequent media changes occurred every 3-4 days. Astrocytes were  
511 collected at 7 and 14 days in vitro (DIV).

#### 512 *Primary astrocyte culture experiments*

513 Primary astrocyte cultures were utilized at 14 DIV for experiments. Exogenous BDNF (Promega)  
514 was applied in warmed media to a final concentration of 0ng, 10ng, 30ng, or 100ng for 24 hours.  
515 For scavenger experiments, a final concentration of 2ug of TrkB-Fc (R&D Systems) was added  
516 to the wells in warmed media 60 minutes post-BDNF exposure. Equal volumes of warmed media  
517 as the TrkB-Fc condition was additionally added to controls.

#### 518 *Primary astrocyte culture immunofluorescence*

519 Astrocytes were fixed at 15 DIV, after experiments described above. First, pre-warmed  
520 paraformaldehyde (PFA) was added to the culture dish to a final concentration of 2% PFA, and  
521 incubated for 5 minutes at 37°C. This initial step was utilized to preserve any fine peripheral  
522 astrocyte processes that might be sensitive to cold temperatures. After incubation, cells were  
523 washed with cold PBS, followed by fixation with 4% PFA for 15 minutes at room temperature.  
524 Subsequently, cells were incubated for 1 hour in blocking buffer (10% goat serum, 0.3% Triton-X  
525 in PBS). Astrocyte filaments were visualized with GFAP, total membrane with Glact and Ezrin.  
526 Following primary antibody incubations, AlexaFlour 488, 546, and 647 were utilized to visualize  
527 the primary antibodies with 1 hour incubations. Prior to image acquisition, the experimenter was  
528 blinded to experimental conditions. Fluorescent images were acquired with an Olympus VS-120  
529 system or Nikon A1 confocal.

#### 530 *Primary astrocyte culture morphology analysis*

531 The complexity of astrocytes following experiments described above was determined by utilizing  
532 the Shape Index, given as  $\text{perimeter}^2 / \text{area} - 4\pi$  (Holt and Olsen, 2016; Matsutani and Yamamoto,



533 1997). A perfect circle results in an index of 1, and increasingly complex cells have  
534 correspondingly larger indexes. Area and perimeter of the cells were determined manually using  
535 ImageJ 1.52b version software. Prior to quantification, experimenter was blinded to experimental  
536 conditions.

#### 537 *In vivo astrocyte morphological analysis*

538 Astrocytes were fluorescently labeled via AAV2/5-driven mCherry or Lck-GFP. Lck-GFP virus—  
539 pAAV.GfaABC1D.PI.Lck-GFP.SV40—was a gift from Baljit Khakh (Addgene viral prep # 105598-  
540 AAV5). AAV2/5 GfaABC1D.mCherry was obtained from Vector Biolabs. Postnatal day 0-1 pups  
541 were intraventricularly injected with 2-3 $\mu$ L  $2.3 \times 10^8$  virus following hypothermia-induced  
542 anesthesia. The injection site was determined following (Chakrabarty et al., 2013; Kim et al., 2014;  
543 Shen et al., 2001), with equidistance between the bregma and lambda sutures, 1mm lateral from  
544 the midline, and 3mm depth. Hamilton 10 $\mu$ L syringes and 32G needles were used. Animals were  
545 collected at PND14 and PND28-30 (referred to PND28 in manuscript). At time of collection,  
546 animals were deeply anesthetized with peritoneal injections of 100mg/kg ketamine and  
547 intracardially perfused with PBS, followed by 4% PFA for 20 minutes. Brains were post-fixed for  
548 72 hours, and subsequently sliced on Pelco Easislicer microtome at 100 $\mu$ M sections.  
549 Experimenter was blinded to animal genotypes prior to image acquisition and analysis. Layer II/III  
550 motor cortex astrocytes were imaged on a Nikon A1 confocal with 40x oil immersion lens (OFN25)  
551 and 3x digital zoom. Z-stacks were acquired with 0.225  $\mu$ M step sizes. Laser power and gain were  
552 adjusted for each individual astrocyte. Z-stacks were 3D reconstructed on Imaris x64 9.0.2, and  
553 surface reconstruction utilized to estimate astrocyte volume. Sholl analysis was additionally  
554 performed in Imaris. Following surface reconstruction of astrocyte branch processes, the  
555 Filaments function was utilized followed by subsequent Sholl analysis function. Prior to  
556 quantification, experimenter was blinded to experimental conditions.

#### 557 *Primary neuron culture*

558 Neurons were cultured from p0-1 mouse pups according to Beaudoin et al. 2012 and as described  
559 above with modifications. In brief, following cortical dissociation, microglia and oligodendrocytes  
560 were first removed with 10 $\mu$ L incubation with Cd11b<sup>+</sup> and Mbp<sup>+</sup> microbeads for 10 minutes. The  
561 flow through was collected and used to further isolate neuronal populations utilizing Miltenyi  
562 Biotec's Neuron Isolation Kit. The cell suspension was incubated with 10 $\mu$ L biotinylated antibodies  
563 for 10 minutes at 4°C, followed by a 10 minute incubation with 15 $\mu$ L anti-biotin microbeads. Cells  
564 were applied to a prepped LS column. Neurons were collected in the flow through of two washes.  
565 Neuronal cell number was determined, and 0.75-1.0 x 10<sup>5</sup> cells were plated on 13mm glass  
566 coverslips in a 24 well plate. The coverslips were poly-l-lysine treated and laminin-coated.  
567 Neurons were maintained in neuronal maintenance media (Beaudoin et al., 2012) (Neurobasal  
568 media, 2mM l-glutamine, and 1x B27). On the first day post-plating, 2 $\mu$ M of araC was added to  
569 reduce non-neuronal contamination. On the second day post-plating, a media change was  
570 performed to remove araC. Subsequent media changes occurred every 3-4 days. At 3DIV 0.75-  
571 1.0 x 10<sup>5</sup> WT or TrkB.T1 KO astrocytes from p5 pups were plated on top of neurons. Cells were  
572 collected at 8-9 DIV for synapse quantification.

### 573 *Neuron synapse quantification*

574 Cells were fixed at 8-9 DIV, after experiments described above. Fixation was performed as  
575 described above. Subsequently, cells were incubated for 1 hour in blocking buffer (10% goat  
576 serum, 0.3% Triton-X in PBS). Excitatory synapses were visualized with presynaptic marker  
577 VGLUT1 and with postsynaptic marker PSD95. Following primary antibody incubations,  
578 AlexaFlour 488 and 647 were utilized to visualize the primary antibodies with 1 hour incubations  
579 at 1:500. These secondaries were chosen for their excitation/emission spectrum, which  
580 demonstrate no overlap. Therefore, co-localization analysis of pre- and post-synaptic markers  
581 can be utilized with confidence of true co-localization. Prior to image acquisition, the experimenter  
582 was blinded to experimental conditions. Confocal images were acquired on Nikon A1 confocal  
583 with 40x objective and 3 digital zoom. Care was taken to ensure each individual neuron imaged

584 was equidistance from other neurons and astrocytes. Co-localization, and therefore synapse  
 585 number, was determined utilizing Puncta Analysis FIJI plug-in (Ippolito and Eroglu, 2010; Stogsdill  
 586 et al., 2017).

587 *Statistical analysis*

588 To determine statistical significance, Origin and Graphpad Prism were utilized. All data is  
 589 represented as mean +/- SEM, with n's indicated where appropriate. D'Agostino-Pearson  
 590 normality test was performed to determine the normality distribution of each data set, and outliers  
 591 were determined via GraphPad Prism's ROUT method. Student's t-tests were performed, or Mann  
 592 Whitney U tests for nonparametric data, for all data in which only one comparison was needed.  
 593 One-way ANOVAs, or Kruskal-Wallis test for nonparametric data, followed by Tukey's post-hoc  
 594 test performed for all data with multiple comparisons.

595  
 596 **Table 1. Antibodies, AAV and pharmacological agents and catalog, catalogue,**  
 597 **company and concentrations**  
 598

| Reagent                     | Utilization                                             | Company (Cat. No.)         | Concentration / Time                          |
|-----------------------------|---------------------------------------------------------|----------------------------|-----------------------------------------------|
| Rb-GFAP                     | In vitro astrocyte morphology–branch processes          | DAKO (Z0334)               | 1:1000 / Overnight                            |
| Rb-Glast                    | In vitro astrocyte morphology–membrane                  | Abcam (ab416)              | 1:500 / Overnight                             |
| Ms-Ezrin                    | In vitro astrocyte morphology—peripheral processes      | Sigma (E8897)              | 1:500 / Overnight                             |
| Gp-VGLUT1                   | Excitatory presynapse                                   | Millipore (AB5905)         | 1:1000 / Overnight                            |
| Ms-PSD95                    | Excitatory postsynapse                                  | NeuroMab (75028)           | 1:1500 / Overnight                            |
| Rb-TrkB (pan)               | Visualization of full length and truncated TrkB protein | Millipore (07-225)         | 1:1000 / 1 hour, WB<br>1:1000 / Overnight, IF |
| AAV2/5<br>GfaABC1D.mCherry  | Astrocyte morphology – Sholl analysis                   | Addgene (#58909)           | 2-3uL 3.67 x 10 <sup>8</sup>                  |
| AAV2/5<br>GfaABC1D.lck-eGFP | Astrocyte morphology—Volume reconstruction              | Addgene (#105598)          | 2-3uL 2.3 x 10 <sup>8</sup>                   |
| TrkB-Fc                     | BDNF scavenger                                          | R&D Systems (# 688-TK-100) | 2ug                                           |

599 **Table 2. QPCR primers and catalog numbers utilized.**

| <b>Gene Name</b>       | <b>Target</b>                                  | <b>Cat# or sequence</b> | <b>Utilization</b>            |
|------------------------|------------------------------------------------|-------------------------|-------------------------------|
| <i>Gfap</i>            | Gfap                                           | Mm01253033_m1           | Astrocyte marker              |
| <i>Tmem119</i>         | Tmem119                                        | Mm01248771_m1           | Microglia marker              |
| <i>Mbp</i>             | Myelin basic protein                           | Mm01266402_m1           | Oligodendrocyte marker        |
| <i>Rbfox3</i>          | NeuN                                           | Mm01248771_m1           | Neuron marker                 |
| <i>Cspg4</i>           | NG2                                            | Mm0057256_m1            | OPC marker                    |
| <i>Kcnj10</i>          | Kir4.1                                         | Mm00445028_m1           | Astrocyte maturation marker   |
| <i>Slc1a2</i>          | Glt-1                                          | Mm00441457_m1           | Astrocyte maturation marker   |
| <i>Aqp4</i>            | Aquaporin-4                                    | Mm00802131_m1           | Astrocyte maturation marker   |
| <i>Cxn43</i>           | Connexin-43                                    | Mm01179639_s1           | Astrocyte maturation marker   |
| <i>Ntrk2</i>           | TrkB, transmembrane domain exons               | Mm00435422_m1           | Total TrkB                    |
| <i>Ntrk2 – TrkB.FI</i> | Full length TrkB, tyrosine kinase domain exons | Mm01341761_m1           | Full length TrkB              |
| <i>Ntrk2 – TrkB.T1</i> | Truncated TrkB, exon specific                  | TCAAGTTGGCGAGACATTCCA   | Truncated TrkB                |
| <i>Sparc</i>           | Sparc                                          | Mm00486336_m1           | Astrocyte synaptogenic factor |
| <i>Sparcl</i>          | Hevin                                          | Mm00447784_m1           | Astrocyte synaptogenic factor |
| <i>Gapdh</i>           | Gapdh                                          | 4352339E                | Endogenous control            |

600

601 **Acknowledgements**

602 The authors wish to thank Lara Ianov and CIRC Neurodevelopmental Bioinformatics Initiative for

603 their help in processing the RNA-sequencing and Lina Tessorallo and colleagues for the kind gift

604 of the TrkB.T1 KO mouse model. This work was funded by the National Institutes of Health NINDS  
605 R01NS075062 (M.O.) and F31NS100259 (L.M.H.).

606 **Competing Interests**

607 The authors declare no competing interests.

608



## 610 References

- 611 Afgan, E., Baker, D., van den Beek, M., Blankenberg, D., Bouvier, D., Cech, M., Chilton, J.,  
612 Clements, D., Coraor, N., Eberhard, C., *et al.* (2016). The Galaxy platform for accessible,  
613 reproducible and collaborative biomedical analyses: 2016 update. *Nucleic Acids Res* *44*, W3-  
614 w10.
- 615 Allen, N.J., Bennett, M.L., Foo, L.C., Wang, G.X., Chakraborty, C., Smith, S.J., and Barres, B.A.  
616 (2012). Astrocyte glypicans 4 and 6 promote formation of excitatory synapses via GluA1 AMPA  
617 receptors. *Nature* *486*, 410-414.
- 618 Allen, N.J., and Eroglu, C. (2017). Cell Biology of Astrocyte-Synapse Interactions. *Neuron* *96*,  
619 697-708.
- 620 Autry, A.E., and Monteggia, L.M. (2012). Brain-derived neurotrophic factor and neuropsychiatric  
621 disorders. *Pharmacol Rev* *64*, 238-258.
- 622 Beaudoin, G.M., 3rd, Lee, S.H., Singh, D., Yuan, Y., Ng, Y.G., Reichardt, L.F., and Arikath, J.  
623 (2012). Culturing pyramidal neurons from the early postnatal mouse hippocampus and cortex.  
624 *Nat Protoc* *7*, 1741-1754.
- 625 Bernardinelli, Y., Randall, J., Janett, E., Nikonenko, I., Konig, S., Jones, E.V., Flores, C.E., Murai,  
626 K.K., Bochet, C.G., Holtmaat, A., *et al.* (2014). Activity-dependent structural plasticity of  
627 perisynaptic astrocytic domains promotes excitatory synapse stability. *Curr Biol* *24*, 1679-1688.
- 628 Bushong, E.A., Martone, M.E., and Ellisman, M.H. (2004). Maturation of astrocyte morphology  
629 and the establishment of astrocyte domains during postnatal hippocampal development. *Int J*  
630 *Dev Neurosci* *22*, 73-86.
- 631 Bushong, E.A., Martone, M.E., Jones, Y.Z., and Ellisman, M.H. (2002). Protoplasmic astrocytes in  
632 CA1 stratum radiatum occupy separate anatomical domains. *J Neurosci* *22*, 183-192.
- 633 Chakrabarty, P., Rosario, A., Cruz, P., Siemienski, Z., Ceballos-Diaz, C., Crosby, K., Jansen, K.,  
634 Borchelt, D.R., Kim, J.Y., Jankowsky, J.L., *et al.* (2013). Capsid serotype and timing of injection  
635 determines AAV transduction in the neonatal mice brain. *PLoS One* *8*, e67680.
- 636 Christopherson, K.S., Ullian, E.M., Stokes, C.C., Mullowney, C.E., Hell, J.W., Agah, A., Lawler, J.,  
637 Mosher, D.F., Bornstein, P., and Barres, B.A. (2005). Thrombospondins are astrocyte-secreted  
638 proteins that promote CNS synaptogenesis. *Cell* *120*, 421-433.
- 639 Clarke, L.E., Liddelow, S.A., Chakraborty, C., Munch, A.E., Heiman, M., and Barres, B.A. (2018).  
640 Normal aging induces A1-like astrocyte reactivity. *Proceedings of the National Academy of*  
641 *Sciences of the United States of America* *115*, E1896-e1905.
- 642 Deinhardt, K., and Chao, M.V. (2014). Trk receptors. *Handbook of experimental pharmacology*  
643 *220*, 103-119.
- 644 Derouiche, A., and Frotscher, M. (2001). Peripheral astrocyte processes: monitoring by selective  
645 immunostaining for the actin-binding ERM proteins. *Glia* *36*, 330-341.
- 646 Dobin, A., Davis, C.A., Schlesinger, F., Drenkow, J., Zaleski, C., Jha, S., Batut, P., Chaisson, M.,  
647 and Gingeras, T.R. (2013). STAR: ultrafast universal RNA-seq aligner. *Bioinformatics* *29*, 15-21.
- 648 Dorsey, S.G., Renn, C.L., Carim-Todd, L., Barrick, C.A., Bambrick, L., Krueger, B.K., Ward, C.W.,  
649 and Tessarollo, L. (2006). In vivo restoration of physiological levels of truncated TrkB.T1  
650 receptor rescues neuronal cell death in a trisomic mouse model. *Neuron* *51*, 21-28.

651 Farhy-Tselnicker, I., and Allen, N.J. (2018). Astrocytes, neurons, synapses: a tripartite view on  
652 cortical circuit development. *Neural development* *13*, 7.

653 Fenner, B.M. (2012). Truncated TrkB: beyond a dominant negative receptor. *Cytokine & growth*  
654 *factor reviews* *23*, 15-24.

655 Freeman, M.R. (2010). Specification and morphogenesis of astrocytes. *Science* *330*, 774-778.

656 Guo, S., Som, A.T., Waeber, C., and Lo, E.H. (2012). Vascular neuroprotection via TrkB- and Akt-  
657 dependent cell survival signaling. *J Neurochem* *123 Suppl 2*, 58-64.

658 Halassa, M.M., Fellin, T., Takano, H., Dong, J.H., and Haydon, P.G. (2007). Synaptic islands  
659 defined by the territory of a single astrocyte. *J Neurosci* *27*, 6473-6477.

660 Holt, L.M., and Olsen, M.L. (2016). Novel Applications of Magnetic Cell Sorting to Analyze Cell-  
661 Type Specific Gene and Protein Expression in the Central Nervous System. *PLoS One* *11*,  
662 e0150290.

663 Ippolito, D.M., and Eroglu, C. (2010). Quantifying synapses: an immunocytochemistry-based  
664 assay to quantify synapse number. *Journal of visualized experiments : JoVE*.

665 Ji, Y., Pang, P.T., Feng, L., and Lu, B. (2005). Cyclic AMP controls BDNF-induced TrkB  
666 phosphorylation and dendritic spine formation in mature hippocampal neurons. *Nat Neurosci* *8*,  
667 164-172.

668 Johnson, M.A., Weick, J.P., Pearce, R.A., and Zhang, S.C. (2007). Functional neural development  
669 from human embryonic stem cells: accelerated synaptic activity via astrocyte coculture. *J*  
670 *Neurosci* *27*, 3069-3077.

671 Jones, E.V., Bernardinelli, Y., Tse, Y.C., Chierzi, S., Wong, T.P., and Murai, K.K. (2011). Astrocytes  
672 control glutamate receptor levels at developing synapses through SPARC-beta-integrin  
673 interactions. *J Neurosci* *31*, 4154-4165.

674 Kahanovitch, U., Cuddapah, V.A., Pacheco, N.L., Holt, L.M., Mulkey, D.K., Percy, A.K., and Olsen,  
675 M.L. (2018). MeCP2 Deficiency Leads to Loss of Glial Kir4.1. *eNeuro* *5*.

676 Kelley, K.W., Nakao-Inoue, H., Molofsky, A.V., and Oldham, M.C. (2018). Variation among intact  
677 tissue samples reveals the core transcriptional features of human CNS cell classes. *Nat Neurosci*  
678 *21*, 1171-1184.

679 Kim, J.Y., Grunke, S.D., Levites, Y., Golde, T.E., and Jankowsky, J.L. (2014).  
680 Intracerebroventricular viral injection of the neonatal mouse brain for persistent and  
681 widespread neuronal transduction. *Journal of visualized experiments : JoVE*, 51863.

682 Klein, R., Parada, L.F., Coulier, F., and Barbacid, M. (1989). trkB, a novel tyrosine protein kinase  
683 receptor expressed during mouse neural development. *Embo j* *8*, 3701-3709.

684 Kline, D.D., Ogier, M., Kunze, D.L., and Katz, D.M. (2010). Exogenous brain-derived neurotrophic  
685 factor rescues synaptic dysfunction in Mecp2-null mice. *J Neurosci* *30*, 5303-5310.

686 Kondo, K., Hashimoto, H., Kitanaka, J., Sawada, M., Suzumura, A., Marunouchi, T., and Baba, A.  
687 (1995). Expression of glutamate transporters in cultured glial cells. *Neurosci Lett* *188*, 140-142.

688 Kucukdereli, H., Allen, N.J., Lee, A.T., Feng, A., Ozlu, M.I., Conatser, L.M., Chakraborty, C.,  
689 Workman, G., Weaver, M., Sage, E.H., *et al.* (2011). Control of excitatory CNS synaptogenesis by  
690 astrocyte-secreted proteins Hevin and SPARC. *Proceedings of the National Academy of Sciences*  
691 *of the United States of America* *108*, E440-449.

692 Lavalie, M., Aumann, G., Anlauf, E., Prols, F., Arpin, M., and Derouiche, A. (2011). Structural  
693 plasticity of perisynaptic astrocyte processes involves ezrin and metabotropic glutamate



694 receptors. *Proceedings of the National Academy of Sciences of the United States of America*  
695 *108*, 12915-12919.

696 Li, H., Handsaker, B., Wysoker, A., Fennell, T., Ruan, J., Homer, N., Marth, G., Abecasis, G., and  
697 Durbin, R. (2009). The Sequence Alignment/Map format and SAMtools. *Bioinformatics* *25*,  
698 2078-2079.

699 Liao, Y., Smyth, G.K., and Shi, W. (2014). featureCounts: an efficient general purpose program  
700 for assigning sequence reads to genomic features. *Bioinformatics* *30*, 923-930.

701 Love, M.I., Huber, W., and Anders, S. (2014). Moderated estimation of fold change and  
702 dispersion for RNA-seq data with DESeq2. *Genome Biol* *15*, 550.

703 Matsutani, S., and Yamamoto, N. (1997). Neuronal regulation of astrocyte morphology in vitro  
704 is mediated by GABAergic signaling. *Glia* *20*, 1-9.

705 Matyas, J.J., O'Driscoll, C.M., Yu, L., Coll-Miro, M., Daugherty, S., Renn, C.L., Faden, A.I., Dorsey,  
706 S.G., and Wu, J. (2017). Truncated TrkB.T1-Mediated Astrocyte Dysfunction Contributes to  
707 Impaired Motor Function and Neuropathic Pain after Spinal Cord Injury. *J Neurosci* *37*, 3956-  
708 3971.

709 Middlemas, D.S., Meisenhelder, J., and Hunter, T. (1994). Identification of TrkB  
710 autophosphorylation sites and evidence that phospholipase C-gamma 1 is a substrate of the  
711 TrkB receptor. *J Biol Chem* *269*, 5458-5466.

712 Molofsky, A.V., and Deneen, B. (2015). Astrocyte development: A Guide for the Perplexed. *Glia*  
713 *63*, 1320-1329.

714 Molofsky, A.V., Krencik, R., Ullian, E.M., Tsai, H.H., Deneen, B., Richardson, W.D., Barres, B.A.,  
715 and Rowitch, D.H. (2012). Astrocytes and disease: a neurodevelopmental perspective. *Genes*  
716 *Dev* *26*, 891-907.

717 Morel, L., Higashimori, H., Tolman, M., and Yang, Y. (2014). VGLuT1+ neuronal glutamatergic  
718 signaling regulates postnatal developmental maturation of cortical protoplasmic astroglia. *J*  
719 *Neurosci* *34*, 10950-10962.

720 Nwaobi, S.E., Lin, E., Peramsetty, S.R., and Olsen, M.L. (2014). DNA methylation functions as a  
721 critical regulator of Kir4.1 expression during CNS development. *Glia* *62*, 411-427.

722 Oberheim, N.A., Goldman, S.A., and Nedergaard, M. (2012). Heterogeneity of astrocytic form  
723 and function. *Methods Mol Biol* *814*, 23-45.

724 Ohira, K., Funatsu, N., Homma, K.J., Sahara, Y., Hayashi, M., Kaneko, T., and Nakamura, S.  
725 (2007). Truncated TrkB-T1 regulates the morphology of neocortical layer I astrocytes in adult  
726 rat brain slices. *The European journal of neuroscience* *25*, 406-416.

727 Ohira, K., Kumanogoh, H., Sahara, Y., Homma, K.J., Hirai, H., Nakamura, S., and Hayashi, M.  
728 (2005). A truncated tropomyosin-related kinase B receptor, T1, regulates glial cell morphology  
729 via Rho GDP dissociation inhibitor 1. *J Neurosci* *25*, 1343-1353.

730 Park, H., and Poo, M.M. (2013). Neurotrophin regulation of neural circuit development and  
731 function. *Nature reviews Neuroscience* *14*, 7-23.

732 Pertea, M., Kim, D., Pertea, G.M., Leek, J.T., and Salzberg, S.L. (2016). Transcript-level  
733 expression analysis of RNA-seq experiments with HISAT, StringTie and Ballgown. *Nat Protoc* *11*,  
734 1650-1667.

735 Pfrieger, F.W., and Barres, B.A. (1997). Synaptic efficacy enhanced by glial cells in vitro. *Science*  
736 *277*, 1684-1687.

737 Regan, M.R., Huang, Y.H., Kim, Y.S., Dykes-Hoberg, M.I., Jin, L., Watkins, A.M., Bergles, D.E., and  
738 Rothstein, J.D. (2007). Variations in Promoter Activity Reveal a Differential Expression and  
739 Physiology of Glutamate Transporters by Glia in the Developing and Mature CNS. *Journal of*  
740 *Neuroscience* 27, 6607-6619.

741 Rose, C.R., Blum, R., Pichler, B., Lepier, A., Kafitz, K.W., and Konnerth, A. (2003). Truncated  
742 TrkB-T1 mediates neurotrophin-evoked calcium signalling in glia cells. *Nature* 426, 74-78.

743 Shen, J.S., Watabe, K., Ohashi, T., and Eto, Y. (2001). Intraventricular administration of  
744 recombinant adenovirus to neonatal twitcher mouse leads to clinicopathological  
745 improvements. *Gene therapy* 8, 1081-1087.

746 Stogsdill, J.A., Ramirez, J., Liu, D., Kim, Y.H., Baldwin, K.T., Enustun, E., Ejikeme, T., Ji, R.R., and  
747 Eroglu, C. (2017). Astrocytic neuroligins control astrocyte morphogenesis and synaptogenesis.  
748 *Nature* 551, 192-197.

749 Stoica, A., Larsen, B.R., Assentoft, M., Holm, R., Holt, L.M., Vilhardt, F., Vilsen, B., Lykke-  
750 Hartmann, K., Olsen, M.L., and MacAulay, N. (2017). The alpha2beta2 isoform combination  
751 dominates the astrocytic Na(+)/K(+)-ATPase activity and is rendered nonfunctional by the  
752 alpha2.G301R familial hemiplegic migraine type 2-associated mutation. *Glia* 65, 1777-1793.

753 Stork, T., Sheehan, A., Tasdemir-Yilmaz, O.E., and Freeman, M.R. (2014). Neuron-glia  
754 interactions through the Heartless FGF receptor signaling pathway mediate morphogenesis of  
755 *Drosophila* astrocytes. *Neuron* 83, 388-403.

756 Ullian, E.M., Sapperstein, S.K., Christopherson, K.S., and Barres, B.A. (2001). Control of synapse  
757 number by glia. *Science* 291, 657-661.

758 Zeug, A., Muller, F.E., Anders, S., Herde, M.K., Minge, D., Ponimaskin, E., and Henneberger, C.  
759 (2018). Control of astrocyte morphology by Rho GTPases. *Brain Res Bull* 136, 44-53.

760 Zhang, Y., Chen, K., Sloan, S.A., Bennett, M.L., Scholze, A.R., O'Keefe, S., Phatnani, H.P.,  
761 Guarnieri, P., Caneda, C., Ruderisch, N., *et al.* (2014). An RNA-sequencing transcriptome and  
762 splicing database of glia, neurons, and vascular cells of the cerebral cortex. *J Neurosci* 34,  
763 11929-11947.

764 Zhang, Y., Sloan, S.A., Clarke, L.E., Caneda, C., Plaza, C.A., Blumenthal, P.D., Vogel, H., Steinberg,  
765 G.K., Edwards, M.S., Li, G., *et al.* (2016). Purification and Characterization of Progenitor and  
766 Mature Human Astrocytes Reveals Transcriptional and Functional Differences with Mouse.  
767 *Neuron* 89, 37-53.

768
